# Supplementary material for: Graphene oxide as a pesticide carrier for enhancing fungicide activity against Magnaporthe oryzae
Source: Royal Society of Chemistry journal article supplement (doi:10.1039/d0nj04721j), 2020-12-17
Supplement: d0nj04721j1.pdf [file d0nj04721j1.pdf]

## **Graphene oxide as pesticide carriers for enhancing fungicide activity against *Magnaporthe oryzae***

Pengtong Hu,<sup>a,b</sup> Li Zhu,<sup>a,c</sup> Feng Zheng,<sup>a,b</sup> Jingyun Lai,<sup>a</sup> Hanhong Xu,<sup>\*,b,c</sup>  
and Jinliang Jia<sup>\*,a,b,c</sup>

<sup>a</sup> Key Laboratory for Biobased Materials and Energy of Ministry of Education, College of Materials and Energy, South China Agricultural University, Guangzhou, Guangdong 510642, China

<sup>b</sup> Key Laboratory of Natural Pesticide & Chemical Biology, Ministry of Education, South China Agricultural University, Guangzhou, 510642, China

<sup>c</sup> Guangdong Laboratory for Lingnan Modern Agricultural Science and Technology, Guangzhou, Guangdong 510642, China

\*Corresponding Authors: [hwxu@scau.edu.cn](mailto:hwxu@scau.edu.cn) (H. X);

[jiajinliang@scau.edu.cn](mailto:jiajinliang@scau.edu.cn) (J. J).

## **Contents of supporting information**

**Fig. S1.** The linear fit chart of drug release model, Zero-order (a), First-order model (b) and Higuchi model (c).

**Fig. S2.** Standard curve of CBZ detected in HPLC.

**Fig. S3.** TG profiles and DTG analysis of UGO.

**Table S1.** Kinetic parameters of CBZ released from CBZ-GO and CBZ-UGO.

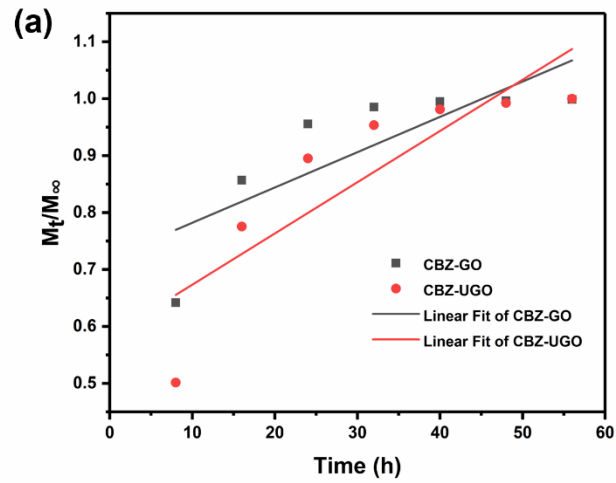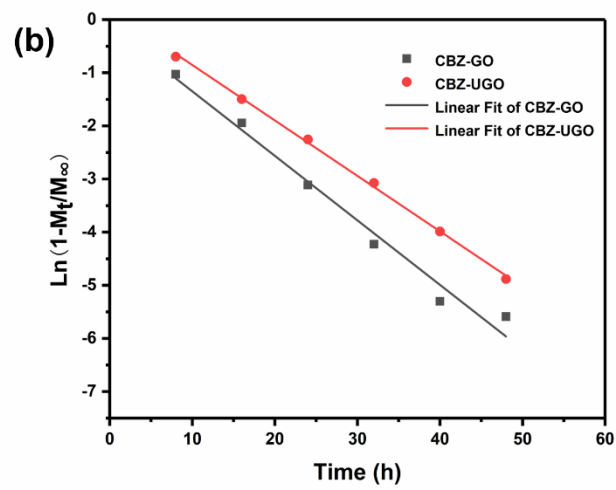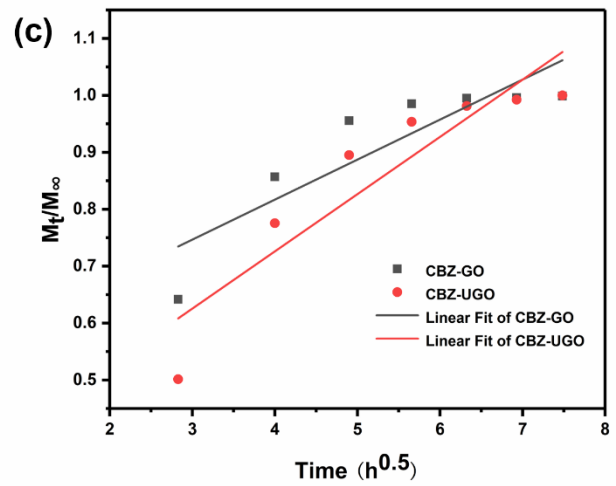

**Fig. S1.** The linear fit chart of drug release model, Zero-order (a), First-order model (b) and Higuchi model (c)

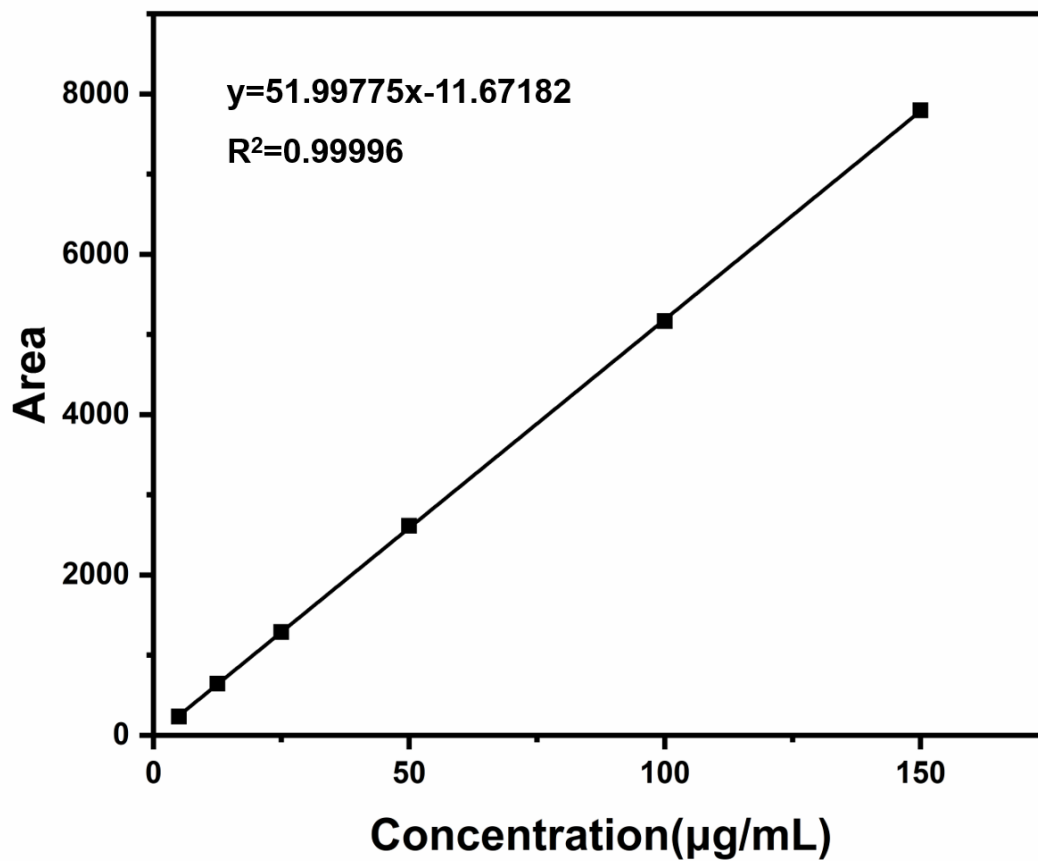

Fig. S2. Standard curve of CBZ detected in HPLC.

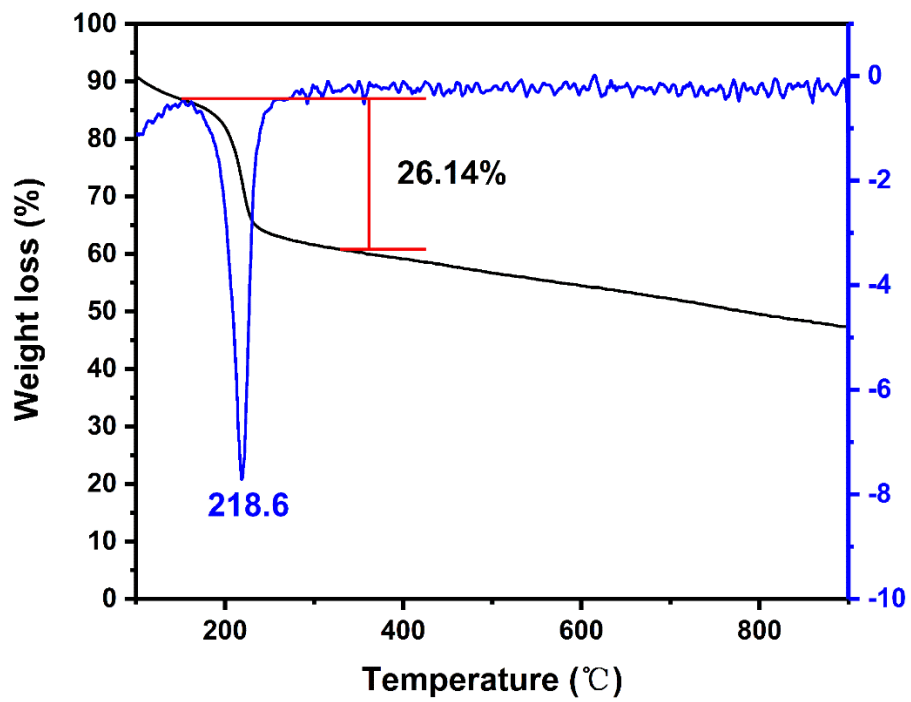

Fig. S3. TG profiles and DTG analysis of UGO.

**Table S1. Kinetic parameters of CBZ released from CBZ-GO and CBZ-UGO.**

|         | Zero-orde model |                | First-orde model |                | Higuchi model |                |
|---------|-----------------|----------------|------------------|----------------|---------------|----------------|
|         | k               | R <sup>2</sup> | k                | R <sup>2</sup> | k             | R <sup>2</sup> |
| CBZ-GO  | 0.0062          | 0.6591         | -0.1214          | 0.9818         | 0.0703        | 0.7753         |
| CBZ-UGO | 0.0090          | 0.7378         | -0.1044          | 0.9987         | 0.1005        | 0.8431         |
